# Supplementary material for: Thermodynamic and structural variations along the olivenite–libethenite solid solution
Source: Copernicus journal article supplement (doi:10.5194/ejm-35-157-2023), 2023-03-21
Supplement: Supplementary file 1 [file ejm-35-157-2023-supplement.zip]

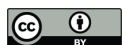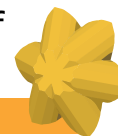

## *Supplement of*

# **Thermodynamic and structural variations along the olivenite–libethenite solid solution**

**Juraj Majzlan et al.**

*Correspondence to:* Juraj Majzlan ([juraj.majzlan@uni-jena.de](mailto:juraj.majzlan@uni-jena.de))

- [ejm-35-157-2023-supplement-title-page.pdf](#)
- [Cp\\_Olivenite\\_Libethenite.xls](#)
- [OlivLib\\_PAs\\_0100\\_processed.csv](#)
- [OlivLib\\_PAs\\_1000\\_processed.csv](#)
- [OlivLib\\_PAs\\_1090\\_processed.csv](#)
- [OlivLib\\_PAs\\_2080\\_processed.csv](#)
- [OlivLib\\_PAs\\_3070\\_processed.csv](#)
- [OlivLib\\_PAs\\_4060\\_processed.csv](#)
- [OlivLib\\_PAs\\_5050\\_processed.csv](#)
- [OlivLib\\_PAs\\_6040\\_processed.csv](#)
- [OlivLib\\_PAs\\_7030\\_processed.csv](#)
- [OlivLib\\_PAs\\_8020\\_processed.csv](#)
- [OlivLib\\_PAs\\_9010\\_processed.csv](#)
- [Olivenite\\_AsP\\_3DED.cif](#)
- [Supp-Figures.pdf](#)

The copyright of individual parts of the supplement might differ from the article licence.
