# Supplementary material for: Thermodynamic and structural variations along the olivenite–libethenite solid solution
Source: Copernicus journal article supplement (doi:10.5194/ejm-35-157-2023), 2023-03-21
Supplement: Supplementary file 2 [file ejm-35-157-2023-supplement.zip]

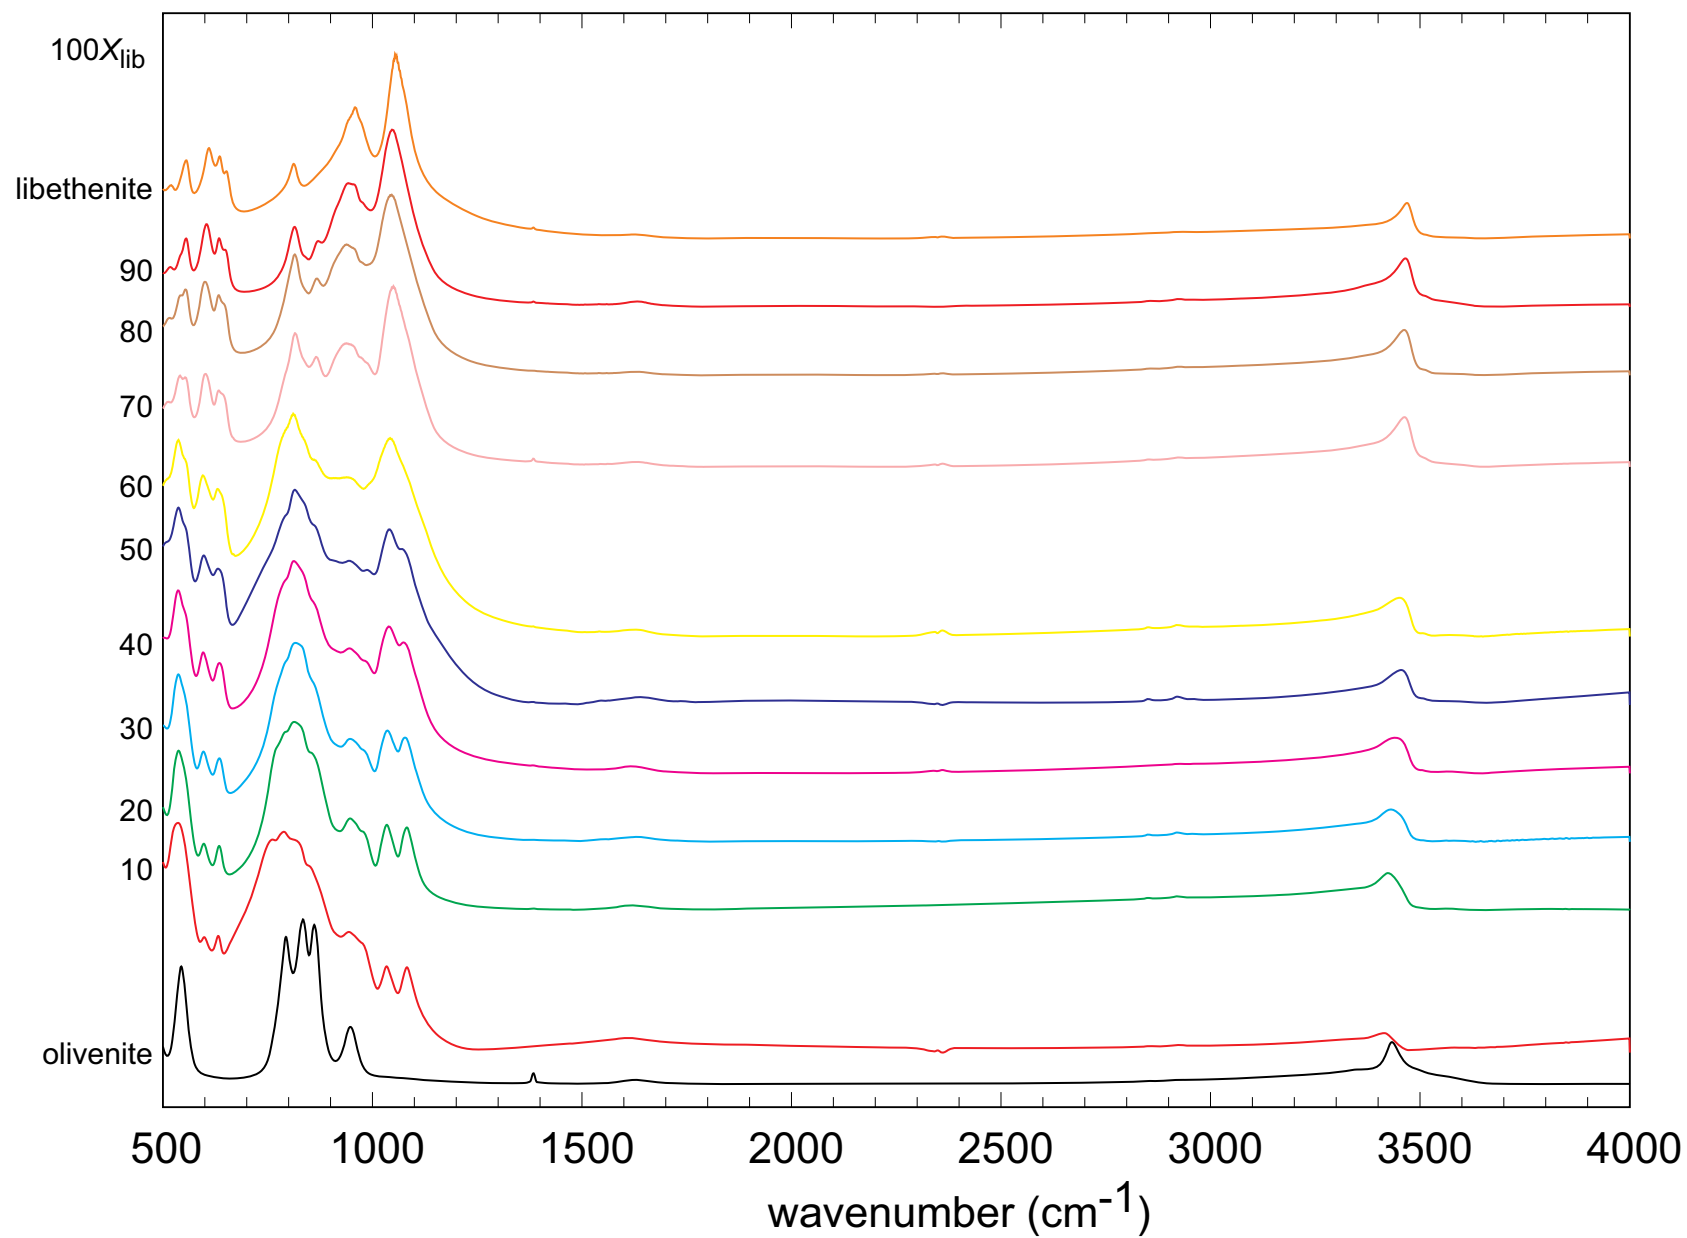

Fig. S1. Complete FTIR spectra of the synthetic samples used in this work.

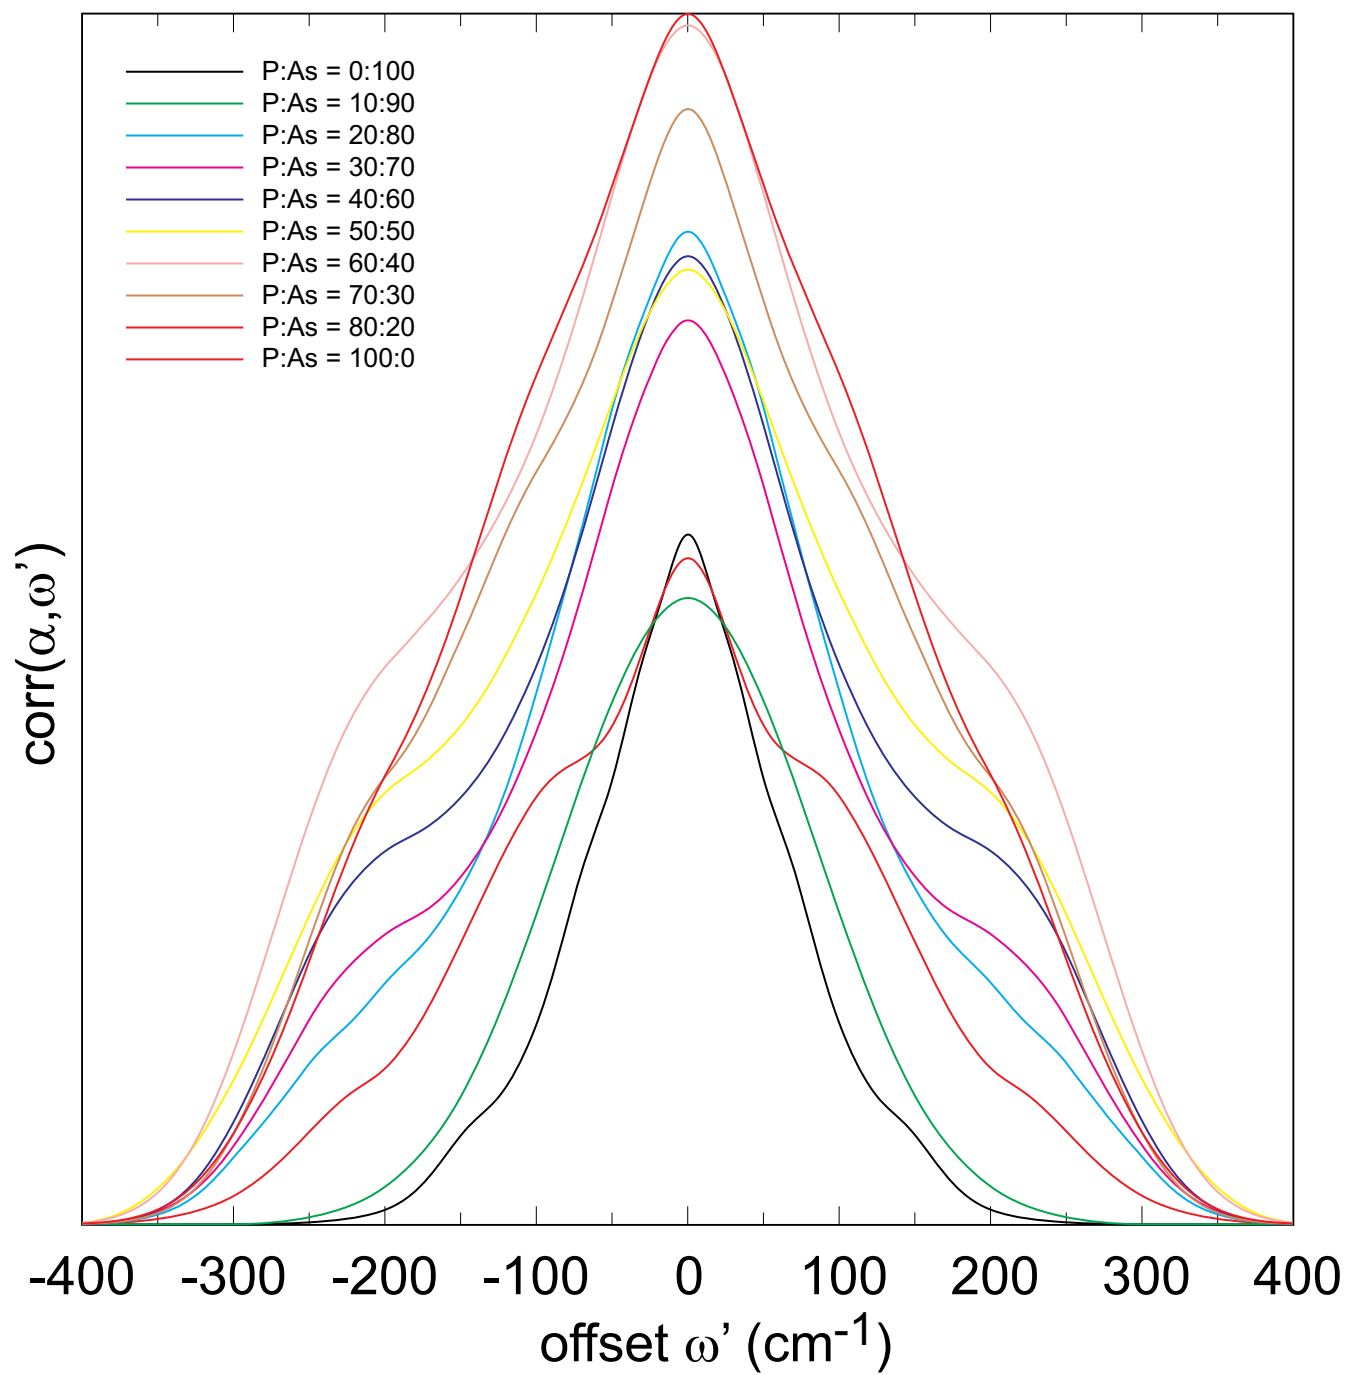

Fig. S2. Autocorrelation functions for all spectra acquired and processed in this work.

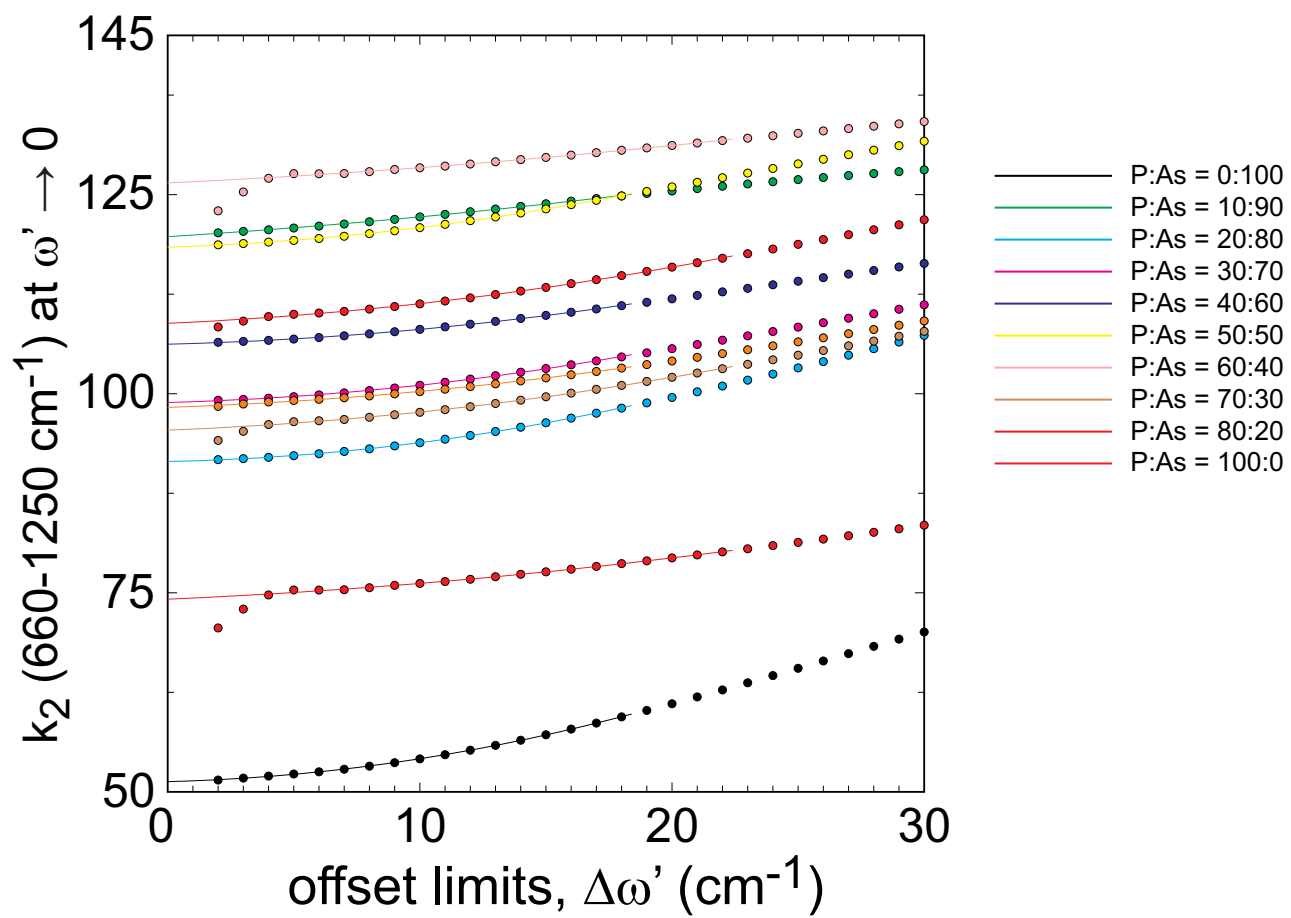

Fig. S3. Extrapolation of the  $k_2$  values (defined by the Gaussian function) to an offset limit of 0  $\text{cm}^{-1}$ .
